# Supplementary material for: Development of a benchmark tool for cancer centers; results from a pilot exercise
Source: PubMed Central journal article supplement (PMC6180585; doi:10.1186/s12913-018-3574-z), 2018-10-10
Supplement: 12913_2018_3574_MOESM1_ESM.pdf [file 12913_2018_3574_MOESM1_ESM.pdf]

Appendix 1 Sample of BENCH-CAN  
semi-structured interview topic list and  
questions

## 1. Quality Control

### *Indicator 3.2a Strategies/systems for quality improvement*

Questions: - You say that the quality manager sets the goals for quality management and that this is audited externally. How does this work?

- QC referents, do they have a medical background? Are they fulltime available for quality control?

### *Indicator 3.4a Adverse event analysis*

Questions: - Adverse event / near misses system. Please explain how this works

- What is included?
- Who are allowed to notify?
- Is everybody notifying?
- Can a notifier see what is happening with the notification?
- What is done with the notification (also frequency)?
- Please describe a top 3 most identified items
- Within what timeframe irregularities investigated?
- Where do employees get the forms or is notification digitally?

### *Indicator 3.4b Results adverse events analysis*

Questions: Are patient complaints anonymous? Is the care giver named in the complaint?

### *Indicator 8.1 Incidents with hazardous materials and products 2012*

Questions: - What kind of incidents were these?

## 2. HR

### *Indicator 2.2a Types of education that are offered by your institute (in house)*

Questions: - Could you please describe which courses are offered inhouse and which external?

- Is there a set budget for following external education?
- Who approves the requests for external education?
- Is there a policy to exchange information from courses?

### *Indicator 2.2b Education-needs analysis*

Questions: - Is there a link with requirements for the accreditation for professionals by

external regulatory bodies

- Could we see the form?

*Indicator 2.2c Staff training on quality and risk management is provided to all staff*

Questions: - What is taught within the quality assurance training?

*Indicator 2.4 Sick-leave registration*

Questions: - Is this information communicated to the departments?

- Is it discussed in meetings?

### **3. IT**

*Indicator 4.3a The institute has a digital system (that stores diagnostic, treatment and outcome data etc. on each patient)*

Questions: - Please draw a figure that shows how the systems are related to each other

- Please describe whether the systems are standard packages or have been developed by/for the Institute?

- Number of staff working in IT department

### **4. Head of Research (or Head of a Research Department)**

*Indicator 3.1b Research portfolio*

Questions: - How is decided on which tumors to focus?

- Can the institute decide by themselves how much money to spend on each research program or is this mainly set by external parties?

Questions: - Could you please describe the organizational structure of research at your center?

- Research groups (PI, MD, non MD, PhD's)
- Supportive services (Patent office etc.)

### **5. Head of Clinical Department (or Head Physician/Nurse)**

*Indicator 3.3b medication management*

- Questions: - Is prescription of chemotherapy/opioids checked by 2 physicians?  
- Before administering the chemotherapy do 1 or 2 nurses check the prescription?

*Indicator 4.2c Transition protocol*

- Questions: - Are there rules for patients discharge?  
- If the patient goes to another care facility how is the communication with this other facility organized or is this done by the patient himself?

*Indicator 5.2 Guideline access*

- Questions - How are guideline translated to daily practice use(protocols etc.)?  
- If there is some deviation from the guideline is this registered?  
- What is done with the registration mentioned above?  
- US or EU guidelines?

*Indicator 5.3 Ensuring patient safety*

- Questions: - Who performs the audits?  
- On which basis are operational procedures updated?

*Indicator 5.5 follow up system*

- Questions: - Organized by specialty or tumour type?  
- Included in guidelines?
